# Supplementary material for: Early Identification of Sepsis-Induced Acute Kidney Injury by Using Monocyte Distribution Width, Red-Blood-Cell Distribution, and Neutrophil-to-Lymphocyte Ratio
Source: MDPI journal article supplement (doi:10.3390/diagnostics14090918), 2024-04-28
Supplement: s1 [file s1]

Supplemental Table S1. Shapiro-Wilk Test

| Variables    | Statistic | df  | <i>P</i> value |
|--------------|-----------|-----|----------------|
| Age          | 0.965     | 271 | <0.001         |
| MDW          | 0.903     | 271 | <0.001         |
| RDW          | 0.732     | 271 | <0.001         |
| initial SOFA | 0.855     | 271 | <0.001         |
| MAP          | 0.967     | 271 | <0.001         |
| NLR          | 0.719     | 270 | <0.001         |

Abbreviations: df: degree of freedom; MDW, monocyte distribution width; RDW, red blood cell volume distribution width; SOFA, sepsis-related organ failure assessment; MAP, mean arterial pressure; NLR, neutrophil-to-lymphocyte ratio.

\*Statistical significance was defined as  $p < 0.05$ .
